# Supplementary material for: Silica-Gentamicin Nanohybrids: Synthesis and Antimicrobial Action
Source: PubMed Central journal article supplement (PMC5456682; doi:10.3390/ma9030170), 2016-03-05
Supplement: materials-09-00170-s001.pdf [file materials-09-00170-s001.pdf]

# Supplementary Materials: Silica-Gentamicin Nanohybrids: Synthesis and Antimicrobial Action

Dina Ahmed Mosselhy, Yanling Ge, Michael Gasik, Katrina Nordström, Olli Natri and Simo-Pekka Hannula

X-ray Diffraction (XRD) Analysis of the Native SiO<sub>2</sub> NPs and SiO<sub>2</sub>-Gentamicin Nanohybrids

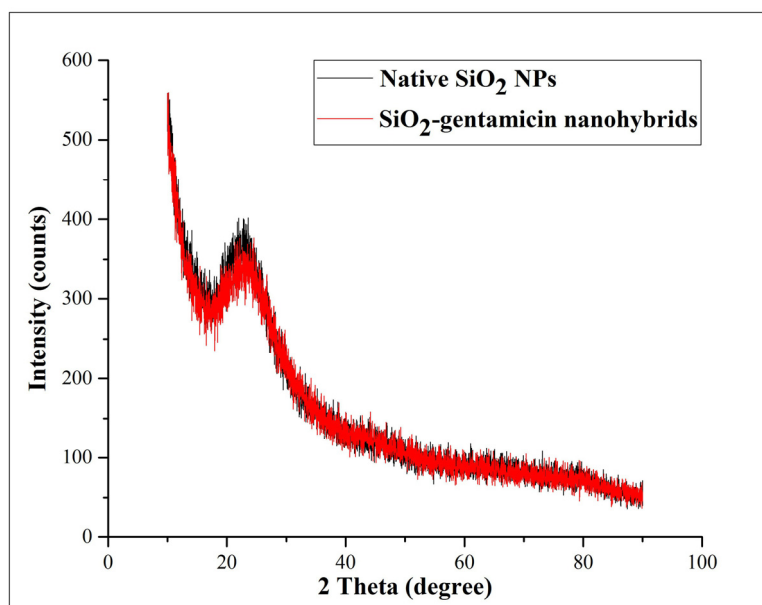

Figure S1. X-ray diffraction (XRD) patterns of the native SiO<sub>2</sub> NPs and SiO<sub>2</sub>-gentamicin nanohybrids.

Agar Diffusion Assay of the SiO<sub>2</sub>-Gentamicin Nanohybrids and Free Gentamicin

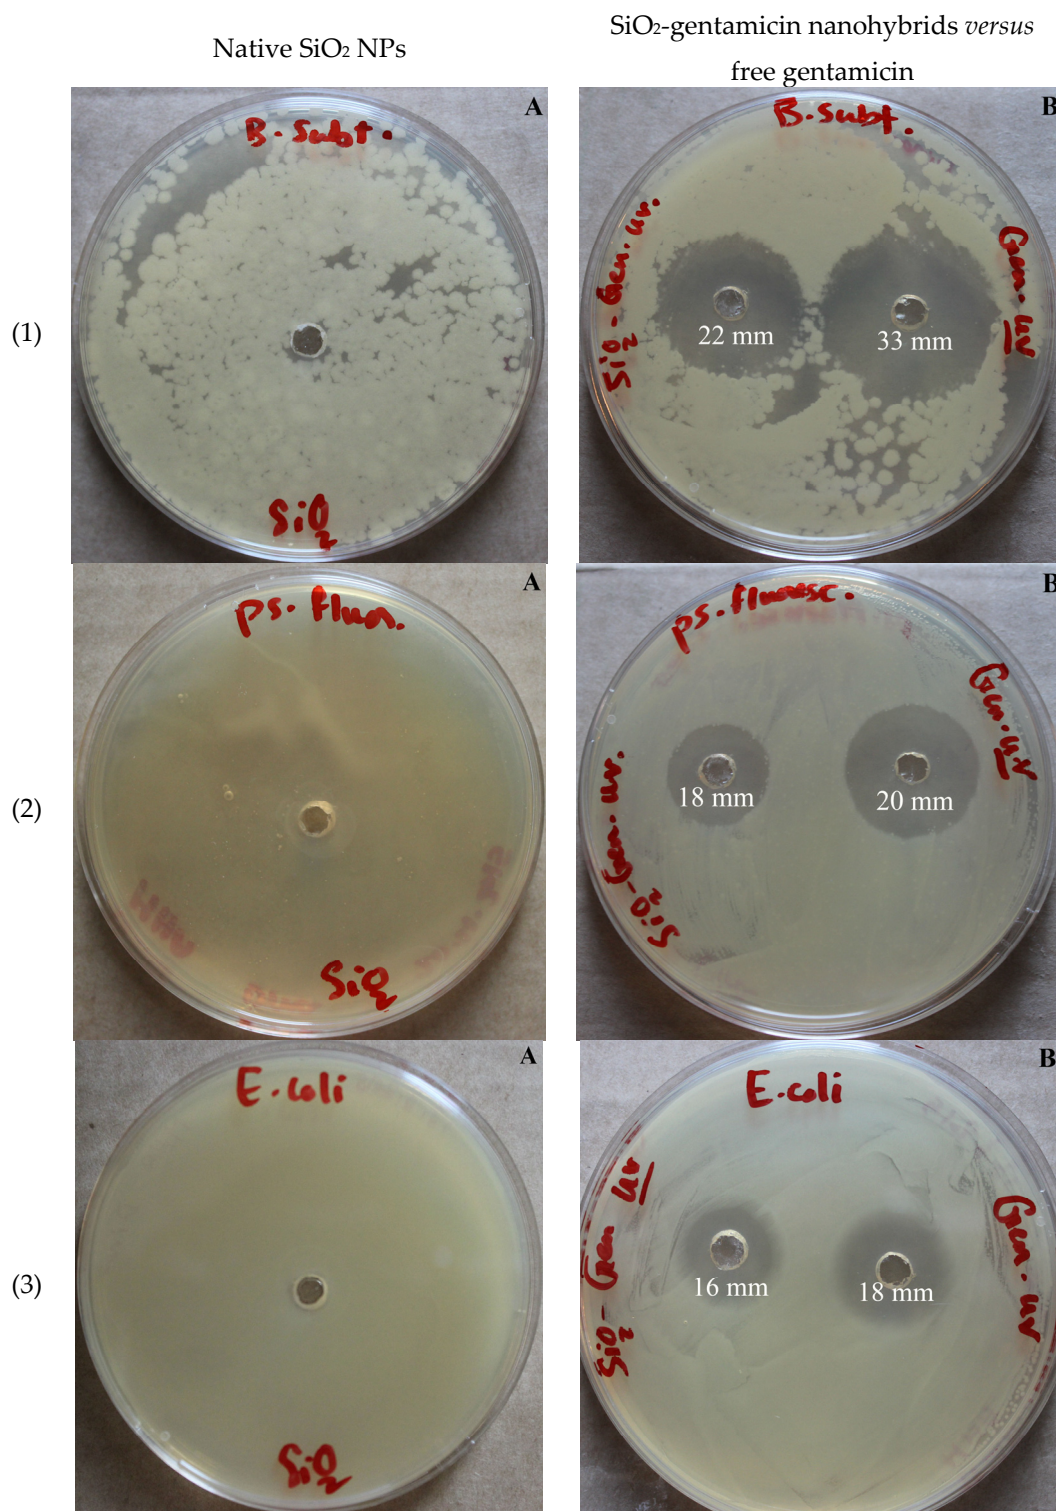

**Figure S2.** Antimicrobial activity of the: (A) native SiO<sub>2</sub> NPs; and (B) SiO<sub>2</sub>-gentamicin nanohybrids *versus* free gentamicin against: (1) *B. subtilis*; (2) *P. fluorescens*; and (3) *E. coli*.
